# Supplementary material for: Factors associated with social participation amongst elders in rural Sri Lanka: a cross-sectional mixed methods analysis
Source: PubMed Central journal article supplement (PMC5956789; doi:10.1186/s12889-018-5482-x), 2018-05-16
Supplement: 12889_2018_5482_MOESM1_ESM.pdf [file 12889_2018_5482_MOESM1_ESM.pdf]

**Burnet Institute and Fred Hollows Foundation  
Better Vision, Healthy Ageing**

**BASELINE SURVEY QUESTIONNAIRE**

AA1. Study Identification Number:

|  |  |  |  |  |
|--|--|--|--|--|
|  |  |  |  |  |
|--|--|--|--|--|

AA2. Estate division: .....or Village: .....

AA3. Date of interview: \_\_\_\_ / \_\_\_\_ / \_\_\_\_

AA4. Abbreviated Mini Mental State Score: □ □

| <i>Question number</i> | <i>Score</i> | <i>Question number</i> | <i>Score</i> |
|------------------------|--------------|------------------------|--------------|
| 1.                     |              | 6.                     |              |
| 2.                     |              | 7.                     |              |
| 3.                     |              | 8.                     |              |
| 4.                     |              | 9.                     |              |
| 5.                     |              | 10.                    |              |

*Notes to interviewers are in italics. Anything in normal print should be read out to the person being interviewed. Anything in italics should not be read out.*

Participant Information Sheet read out and Consent Form signed: □

AA5. Who is answering the questions? 1 □  
*Elder participant* 2 □  
*Family member (proxy respondent)*

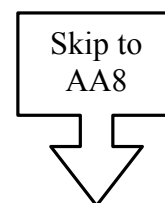

AA6. If family member answering on behalf of the elder, what is their relationship to the elder?  
 Do **not** record their name here:

---

AA7. What is the sex of the family member?: 1 □  
*Male* 2 □  
*Female*

AA8. Is anyone else present during the interview? Yes / No

*If yes, what is their relationship to the elder?*

---

**Section A. Personal details**

I would like to begin by asking you some questions about yourself.

A1. Sex: Female 1   
Male 2

A2. What is your age (last birthday)?

A3. Date of birth (if known):     
Day Month Year  
Not known: 98

A4. What is your marital status? Never married 1   
Married 2   
Widowed 3   
Divorced 4   
Separated 5

A5. Have you retired from work? Yes 1   
*Read all responses* No, work full-time 2   
No, work part-time 3

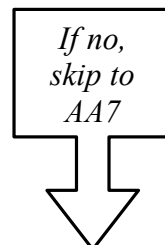

A6. If retired, at what age did you retire?   
Don't know 89

A7. What has been your **main** occupation in life? Tea picker 1   
*Tick one only* Factory worker 2   
Office staff 3   
Sundry worker 4   
Rice farmer 5   
Vegetable farmer 6   
Casual labourer 8   
Other 9

.....

|      |       |
|------|-------|
| SID: | Date: |
|------|-------|

**Section B. Details of household and family**

Now we would like to ask about who you live with, and about your family.

- B1.** Do you live alone? Yes 1  No 2
- B2.** How many people are there in your household, **not** counting yourself?
- B3.** *Do not ask if widowed* – Do you currently live with your husband / wife? Yes 1  No 2
- B4.** What is the age group and sex of each person in your household? Can we please start with the youngest? Do not include yourself.

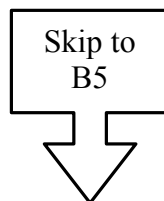

*Tick the boxes in the table below with the information the elder gives to you about the members of their household. Do not write down their names.*

| Household member | Age group |      |       |       |       |     | Sex  |        |
|------------------|-----------|------|-------|-------|-------|-----|------|--------|
|                  | 0-4       | 5-14 | 15-24 | 25-49 | 50-59 | 60+ | Male | Female |
| 1                |           |      |       |       |       |     |      |        |
| 2                |           |      |       |       |       |     |      |        |
| 3                |           |      |       |       |       |     |      |        |
| 4                |           |      |       |       |       |     |      |        |
| 5                |           |      |       |       |       |     |      |        |
| 6                |           |      |       |       |       |     |      |        |
| 7                |           |      |       |       |       |     |      |        |
| 8                |           |      |       |       |       |     |      |        |
| 9                |           |      |       |       |       |     |      |        |
| 10               |           |      |       |       |       |     |      |        |
| 11               |           |      |       |       |       |     |      |        |

- B5.** Has your spouse or any close family member died in the past 2 years? Yes 1  No 2

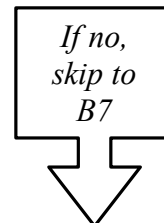

**B6.** I am sorry to hear that. Could you tell me who it was that died?

*Write down the relationship here, e.g. spouse; sister; son; brother.  
If necessary, there is space for more than one death.*

1. ....

2. ....

3. ....

**B7.** Do you live....  
*Read all responses*

|                                          |   |                          |
|------------------------------------------|---|--------------------------|
| in a room in a line?                     | 1 | <input type="checkbox"/> |
| in a mud-brick house?                    | 2 | <input type="checkbox"/> |
| in a wooden house?                       | 3 | <input type="checkbox"/> |
| in a brick, stone or cement block house? | 4 | <input type="checkbox"/> |
| Other.....                               | 9 | <input type="checkbox"/> |

**B8.** How many sons do you have (not including sons-in-law)?

**B9.** How many daughters do you have (not including daughters-in-law)?

**B10.** How many of your sons and/or daughters have moved away?

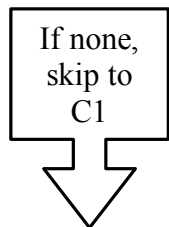

**B11.** Where did they move to?

|                                           |                                                   |
|-------------------------------------------|---------------------------------------------------|
| To another estate                         | <input type="checkbox"/> <input type="checkbox"/> |
| To Colombo or somewhere else in Sri Lanka | <input type="checkbox"/> <input type="checkbox"/> |
| Overseas                                  | <input type="checkbox"/> <input type="checkbox"/> |
| Don't know                                | 89 <input type="checkbox"/>                       |

|      |       |
|------|-------|
| SID: | Date: |
|------|-------|

**Section C. Education**

Next we would like to ask about your schooling.

**C1.** Have you ever attended school?

Yes

1

No

2

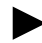

If no,  
skip to  
C3

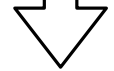

**C2.** If yes, how many years did you have at school in total?

1

**C3.** I am going to show you a sentence written on a card. Can you tell me what is written on this card? *Show the elder the card with the sentence and ask them to read the sentence aloud.*

Able to read whole sentence

1

Able to read only parts of sentence

2

Cannot read at all

3

Vision too poor to tell

4

**C4.** What languages can you speak well enough to have a conversation?

Tamil only

1

Sinhala only

2

Tamil + Sinhala

3

**Section D. Health status**

The next questions are about your health and well-being.

**D1.** Can you please tell me if you are currently suffering from any of the following chronic symptoms ('chronic' means you have had the symptom for one month or longer)

*Show the elder the showcard for question D1 and ask "Please tell me for each symptom, whether it is no problem, mild, moderate or severe" - and circle the appropriate number.*

| Symptom                                             | No problem | Mild | Moderate | Severe* |
|-----------------------------------------------------|------------|------|----------|---------|
| A. Joint pains (arthritis)                          | 1          | 2    | 3        | 4       |
| B. Backache                                         | 1          | 2    | 3        | 4       |
| C. Difficulty with hearing                          | 1          | 2    | 3        | 4       |
| D. Difficulty with sight                            | 1          | 2    | 3        | 4       |
| E. Shortness of breath                              | 1          | 2    | 3        | 4       |
| F. Chronic cough                                    | 1          | 2    | 3        | 4       |
| G. Chronic cough with blood*                        | 1          | 2    | 3        | 4       |
| H. Wheezing                                         | 1          | 2    | 3        | 4       |
| I. Chest pain                                       | 1          | 2    | 3        | 4       |
| J. Constipation                                     | 1          | 2    | 3        | 4       |
| K. Tiredness                                        | 1          | 2    | 3        | 4       |
| L. Skin rash                                        | 1          | 2    | 3        | 4       |
| M. Toothache                                        | 1          | 2    | 3        | 4       |
| N. Weakness or paralysis from stroke                | 1          | 2    | 3        | 4       |
| O. Epileptic fits (at least one fit in past 6 mths) | 1          | 2    | 3        | 4       |
| P. Falls (more than one fall in the past mth)       | 1          | 2    | 3        | 4       |
| Q. Leaking of urine                                 | 1          | 2    | 3        | 4       |
| R. Loss of weight                                   | 1          | 2    | 3        | 4       |
| S. Dizziness                                        | 1          | 2    | 3        | 4       |
| T. Any other symptoms or pains?<br>List:            | 1          | 2    | 3        | 4       |

*\*NB. If the elder reports any of these symptoms as severe, or is coughing blood, and has not already seen and been treated for the problem, explain that, because this might be serious, you would like to help them to see a doctor. Complete two copies of the referral form, and give one to the participant or carer, and keep the other one securely in your bag.*

|      |       |
|------|-------|
| SID: | Date: |
|------|-------|

**D2.** Has a doctor ever told you that you have:

- |                                                  |            |    |                          |
|--------------------------------------------------|------------|----|--------------------------|
| A) Diabetes?                                     | Yes        | 1  | <input type="checkbox"/> |
|                                                  | No         | 2  | <input type="checkbox"/> |
|                                                  | Don't know | 89 | <input type="checkbox"/> |
| B) Heart disease?                                | Yes        | 1  | <input type="checkbox"/> |
|                                                  | No         | 2  | <input type="checkbox"/> |
|                                                  | Don't know | 89 | <input type="checkbox"/> |
| C) High blood pressure?                          | Yes        | 1  | <input type="checkbox"/> |
|                                                  | No         | 2  | <input type="checkbox"/> |
|                                                  | Don't know | 89 | <input type="checkbox"/> |
| D) Stroke?                                       | Yes        | 1  | <input type="checkbox"/> |
|                                                  | No         | 2  | <input type="checkbox"/> |
|                                                  | Don't know | 89 | <input type="checkbox"/> |
| E) Cancer?                                       | Yes        | 1  | <input type="checkbox"/> |
|                                                  | No         | 2  | <input type="checkbox"/> |
|                                                  | Don't know | 89 | <input type="checkbox"/> |
| E) Asthma (chronic obstructive airways disease)? | Yes        | 1  | <input type="checkbox"/> |
|                                                  | No         | 2  | <input type="checkbox"/> |
|                                                  | Don't know | 89 | <input type="checkbox"/> |

**D3.** Have you had any admissions to hospital in the past 6 months?

*If yes, complete the table below*

- Yes 1   
 No 2   
 Don't know 89

| Type of illness or operation | Name of hospital | Number of nights |
|------------------------------|------------------|------------------|
|                              |                  |                  |
|                              |                  |                  |
|                              |                  |                  |
|                              |                  |                  |

*Be aware that the following questions (D4 – D8) are sensitive. Read out the possible responses, and then read them again, slowly*

**D4.** A. How often do you experience urine leakage? *Ask each response in turn*

- Never 0   
 Less than once a month 1   
 A few times a month 2   
 A few times a week 3   
 Every day and/or night 4

B. How much urine do you lose each time? *Ask each response in turn*

- None 0   
 Drops 1   
 Small splashes 2   
 More 3

**D5.** How often do you experience leakage of stools? *Ask each response in turn*

- Never 0   
 Rarely (< once in past 4 weeks) 1   
 Sometimes (< once a week, but once or more in the past 4 weeks) 2   
 Often or usually (< once a day but once a week or more) 3   
 Always (once or more per day) 4

|      |       |
|------|-------|
| SID: | Date: |
|------|-------|



**D6.** How much does leaking of urine or stools affect your quality of life?

*Read all responses*

- Not at all 1
- A little 2
- Somewhat 3
- A great deal 4

**D7.** How much does leaking of urine or stools cause you to limit your social activities?

*Read all responses*

- Not at all 1
- A little 2
- Somewhat 3
- A great deal 4

**D8.** In general would you say that your sight is?...

*Read all responses*

- Excellent 1
- Good 2
- Poor 3
- Blind 4

*NB. 'Blind' means "No more sight than the ability to tell light from dark, and the general direction of a source of light". If the elder says 'blind' please check if they are able to see more than just light and dark. If they can see better than this tick 'Poor'.*

**D9.** When was the last time you had your eyes examined by a professional?

- Never 0
- Less than one year ago 1
- 1 – 2 years ago 2
- 2 – 5 years ago 3
- More than 5 years ago 4
- Don't know 89

**D10.** Do you currently own a pair of spectacles that you use to help you to see?

- Yes 1
- No 2

**D11.** Ask this question to all elders. For those who use spectacles, ask them to answer how difficult performing these tasks are when they are wearing their spectacles.

| Because of your vision, how much problem do you have in:    |                   |                |              |                 |                                       |                |
|-------------------------------------------------------------|-------------------|----------------|--------------|-----------------|---------------------------------------|----------------|
|                                                             | No problem at all | Slight problem | Some problem | Serious problem | Cannot do this because of your vision | Not applicable |
| 1. Climbing stairs?                                         | 1                 | 2              | 3            | 4               | 5                                     | 0              |
| 2. Making out the bumps and holes in the road when walking? | 1                 | 2              | 3            | 4               | 5                                     | 0              |
| 3. Seeing if there are animals or vehicles when walking?    | 1                 | 2              | 3            | 4               | 5                                     | 0              |
| 4. Finding your way in new places?                          | 1                 | 2              | 3            | 4               | 5                                     | 0              |
| 5. Finding your way indoors?                                | 1                 | 2              | 3            | 4               | 5                                     | 0              |
| 6. Seeing the steps of the bus when climbing in or out?     | 1                 | 2              | 3            | 4               | 5                                     | 0              |
| 7. Recognizing the face of a person standing near you?      | 1                 | 2              | 3            | 4               | 5                                     | 0              |
| 8. Locking or unlocking the door?                           | 1                 | 2              | 3            | 4               | 5                                     | 0              |
| 9. Doing your usual work either in the house or outside?    | 1                 | 2              | 3            | 4               | 5                                     | 0              |
| 10. Doing your work up to your usual standard?              | 1                 | 2              | 3            | 4               | 5                                     | 0              |
| 11. Searching for things at home?                           | 1                 | 2              | 3            | 4               | 5                                     | 0              |
| 12. Seeing differences in colours?                          | 1                 | 2              | 3            | 4               | 5                                     | 0              |
| 13. Making out differences in coins or notes?               | 1                 | 2              | 3            | 4               | 5                                     | 0              |
| 14. Going to the toilet?                                    | 1                 | 2              | 3            | 4               | 5                                     | 0              |
| 15. Seeing the level in the container when pouring?         | 1                 | 2              | 3            | 4               | 5                                     | 0              |

|      |       |
|------|-------|
| SID: | Date: |
|------|-------|

**D12.** Because of your eye problems do you...

|                                                             | No problem at all | Slight problem | Some problem | A lot | Cannot do this because of your vision |
|-------------------------------------------------------------|-------------------|----------------|--------------|-------|---------------------------------------|
| 1. Feel frightened to go out at night                       | 1                 | 2              | 3            | 4     | 0                                     |
| 2. Enjoy social functions less?                             | 1                 | 2              | 3            | 4     | 0                                     |
| 3. Feel ashamed that you can't see?                         | 1                 | 2              | 3            | 4     | 0                                     |
| 4. Feel you have become a burden on others?                 | 1                 | 2              | 3            | 4     | 0                                     |
| 5. Feel frightened that you may lose your remaining vision? | 1                 | 2              | 3            | 4     | 0                                     |

**D13.** Ask each of the following questions and tick the appropriate box

|                                                           | No problem at all | Slight problem | Some problem | A lot |
|-----------------------------------------------------------|-------------------|----------------|--------------|-------|
| 1. Do you have reduced vision?                            | 1                 | 2              | 3            | 4     |
| 2. Are you dazzled in bright light?                       | 1                 | 2              | 3            | 4     |
| 3. Is your vision blurred in sunlight?                    | 1                 | 2              | 3            | 4     |
| 4. Does bright light hurt your eyes?                      | 1                 | 2              | 3            | 4     |
| 5. Do you close your eyes because of light from vehicles? | 1                 | 2              | 3            | 4     |
| 6. Does light seem like stars?                            | 1                 | 2              | 3            | 4     |
| 7. Do you have blurred vision?                            | 1                 | 2              | 3            | 4     |

**D14.** Have you ever had cataract surgery?

*Read all responses*

Yes, both eyes 1

Yes, one eye 2

No 3

Don't know 89

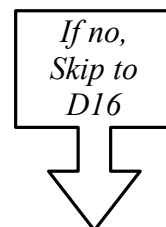

**D15.** Which year did you have the surgery?

*If the elder has had more than one cataract surgery, please put the year of the most recent surgery.*

Don't know 89

**D16.** Can you hear a person at his or her normal volume? Easily 1

*Read all responses*

With some difficulty 2

With a lot of difficulty 3

Unable to do it 4

**D17.** When was the last time you had your teeth checked by a dentist? Never 8

Less than one year ago 1

1 – 2 years ago 2

2 – 5 years ago 3

More than 5 years ago 4

Has no teeth 5

Don't know 89

**D18.** During the last month how often have you Often 1

had to eat less or change what you eat

Sometimes 2

because of problems with your teeth?

Never 3

*Read all responses*

**D19.** In the last 12 months have you suffered any injuries? Yes

No

**D20.** If yes, what type of injury did you suffer?

*Tick all that are true*

Burn 1

Scald (hot water burn) 2

Fall causing bruises or broken bones 3

Poisoning 4

Road traffic injury 5

Near drowning 6

Animal bite 7

Struck / hit by person or object 8

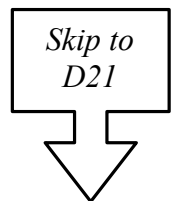

|      |       |
|------|-------|
| SID: | Date: |
|------|-------|

**D21.** For each of the following activities, please tell me if you can do it yourself without difficulty, if you need help, if you are unable to do it at all, or it does not apply to you because you don't do that activity.

*Circle the number for each box, and then add all the numbers for the score*

A.

|                                    | Self,<br>without<br>difficulty | Needs<br>help | Unable to<br>do it at all | Does not<br>apply |
|------------------------------------|--------------------------------|---------------|---------------------------|-------------------|
| Stand up from sitting on a chair   | 0                              | 1             | 2                         |                   |
| Stand up from sitting on the floor | 0                              | 1             | 2                         |                   |
| Bend, stoop or bow                 | 0                              | 1             | 2                         |                   |
| <i>Score for mobility</i>          |                                |               |                           |                   |

B.

|                                                           |   |   |   |  |
|-----------------------------------------------------------|---|---|---|--|
| Eating                                                    | 0 | 1 | 2 |  |
| Dressing or undressing                                    | 0 | 1 | 2 |  |
| Take care of appearance (combing hair / shaving)          | 0 | 1 | 2 |  |
| Walking                                                   | 0 | 1 | 2 |  |
| Get in and out of bed                                     | 0 | 1 | 2 |  |
| Body washing                                              | 0 | 1 | 2 |  |
| Using the toilet                                          | 0 | 1 | 2 |  |
| <i>Score for Dependency in Activities of Daily Living</i> |   |   |   |  |

C.

|                                                                        |   |   |   |  |
|------------------------------------------------------------------------|---|---|---|--|
| Use the telephone                                                      | 0 | 1 | 2 |  |
| Able to take a bus                                                     | 0 | 1 | 2 |  |
| Shop for food                                                          | 0 | 1 | 2 |  |
| Prepare meals                                                          | 0 | 1 | 2 |  |
| Sweep the floor or yard, clean the house                               | 0 | 1 | 2 |  |
| Take medication in right dose at right time                            | 0 | 1 | 2 |  |
| Manage money                                                           | 0 | 1 | 2 |  |
| <i>Score for Dependency in Instrumental Activities of Daily Living</i> |   |   |   |  |

**D22.** How concerned are you about falling when:

|                                                                            | Not at all concerned |   |   | Very concerned |
|----------------------------------------------------------------------------|----------------------|---|---|----------------|
| A. Getting dressed or undressed?                                           | 1                    | 2 | 3 | 4              |
| B. Taking a bath or shower?                                                | 1                    | 2 | 3 | 4              |
| C. Getting in or out of a chair?                                           | 1                    | 2 | 3 | 4              |
| D. Going up or down stairs?                                                | 1                    | 2 | 3 | 4              |
| E. Reaching for something above your head or on the ground?                | 1                    | 2 | 3 | 4              |
| F. Walking up or down a slope?                                             | 1                    | 2 | 3 | 4              |
| G. Going out to a social event (e.g. religious service, family gathering)? | 1                    | 2 | 3 | 4              |

|      |       |
|------|-------|
| SID: | Date: |
|------|-------|



**E3.** Please read each question to the participant. Ask them to assess their feelings, and circle the number on the scale that gives the best answer for them for each question. Where necessary, the questions should be answered in relation to the past two weeks.

|                                            | Not at all | A little | Somewhat | Very much | Extremely |
|--------------------------------------------|------------|----------|----------|-----------|-----------|
| 1. How satisfied are you with your health? | 1          | 2        | 3        | 4         | 5         |

The following questions ask about **how much** you have experienced certain things in the last two weeks.

|                                                                                                  | Not at all | A little | Somewhat | Very much | Completely |
|--------------------------------------------------------------------------------------------------|------------|----------|----------|-----------|------------|
| 2. How satisfied are you with your level of vision and hearing?                                  | 1          | 2        | 3        | 4         | 5          |
| 3. To what extent do you feel that physical pain and discomforts interfere with your activities? | 1          | 2        | 3        | 4         | 5          |
| 4. To what extent do you need any medical treatment to function in your daily life?              | 1          | 2        | 3        | 4         | 5          |

|                                                                                        | Not at all | Slightly | A moderate amount | Very much | Extremely |
|----------------------------------------------------------------------------------------|------------|----------|-------------------|-----------|-----------|
| 5. How much do you enjoy life?                                                         | 1          | 2        | 3                 | 4         | 5         |
| 6. To what extent are you worried about your future?                                   | 1          | 2        | 3                 | 4         | 5         |
| 7. To what extent are you affected by being dependent on others for your requirements? | 1          | 2        | 3                 | 4         | 5         |

|                                                    | Not at all | A little | Somewhat | Very much | Always |
|----------------------------------------------------|------------|----------|----------|-----------|--------|
| 8. Have you been lonely during the past two weeks? | 1          | 2        | 3        | 4         | 5      |

|      |       |
|------|-------|
| SID: | Date: |
|------|-------|



|                                                                            | Not at all | Slightly | A moderate amount | Very much | Extremely |
|----------------------------------------------------------------------------|------------|----------|-------------------|-----------|-----------|
| 9. Are you satisfied with the amount of money you have to meet your needs? | 1          | 2        | 3                 | 4         | 5         |

|                                                        | Not at all | A little | Somewhat | Very much | Always |
|--------------------------------------------------------|------------|----------|----------|-----------|--------|
| 10. How much time have you spent with 'peace of mind'? | 1          | 2        | 3        | 4         | 5      |

|                                                                                                                                       | Not at all | A little | Somewhat | Very much | Extremely |
|---------------------------------------------------------------------------------------------------------------------------------------|------------|----------|----------|-----------|-----------|
| 11. How contented are you with your life (life you have lived, achievements you have had in life and capabilities you have acquired)? | 1          | 2        | 3        | 4         | 5         |
| 12. How much self-esteem do you have?                                                                                                 | 1          | 2        | 3        | 4         | 5         |
| 13. How useful have you been to your family?                                                                                          | 1          | 2        | 3        | 4         | 5         |
| 14. To what extent are you happy with the responsibilities placed on you by family and society?                                       | 1          | 2        | 3        | 4         | 5         |

The following questions ask you to say how satisfied you have felt about various aspects of your life over the past two weeks.

|                                                                                        | Not at all | A little | Somewhat | Very much | Extremely |
|----------------------------------------------------------------------------------------|------------|----------|----------|-----------|-----------|
| 15. How satisfied were you with the preference, quality and quantity of food received? | 1          | 2        | 3        | 4         | 5         |
| 16. How satisfied were you with the opportunities you had for fun and enjoyment?       | 1          | 2        | 3        | 4         | 5         |
| 17. How satisfied were you with the opportunities for rest?                            | 1          | 2        | 3        | 4         | 5         |

|                                                                                                                                                                    | Not at all | A little | Somewhat | Very much | Extremely |
|--------------------------------------------------------------------------------------------------------------------------------------------------------------------|------------|----------|----------|-----------|-----------|
| 18. How satisfied were you with the amount and quality of sleep you had?                                                                                           | 1          | 2        | 3        | 4         | 5         |
| 19. How satisfied were you with the time spent with your children, grandchildren and friends?                                                                      | 1          | 2        | 3        | 4         | 5         |
| 20. How satisfied are you with the recognition you receive from family and society?                                                                                | 1          | 2        | 3        | 4         | 5         |
| 21. How satisfied are you with your ability to perform your day to day work?                                                                                       | 1          | 2        | 3        | 4         | 5         |
| 22. How satisfied are you with your ability to perform essential activities of daily functioning such as eating, using the toilet, grooming, washing and dressing? | 1          | 2        | 3        | 4         | 5         |
| 23. How satisfied are you with the opportunities, access and the quality of health care received?                                                                  | 1          | 2        | 3        | 4         | 5         |
| 24. How satisfied are you with the comforts at your place of living?                                                                                               | 1          | 2        | 3        | 4         | 5         |
| 25. How satisfied are you with the opportunities and time you get to engage in religious and meritorious activities?                                               | 1          | 2        | 3        | 4         | 5         |
| 26. How satisfied are you with your personal relationships?                                                                                                        | 1          | 2        | 3        | 4         | 5         |
| 27. How satisfied are you with your ability and opportunity to take decisions and action regarding yourself?                                                       | 1          | 2        | 3        | 4         | 5         |

|      |       |
|------|-------|
| SID: | Date: |
|------|-------|

The following question refers to how often you have felt or experienced certain things during the last two weeks.

|                                                                                                                                                                   | Never      | Seldom   | Quite often           | Very often | Always    |
|-------------------------------------------------------------------------------------------------------------------------------------------------------------------|------------|----------|-----------------------|------------|-----------|
| 28. How often have you had negative feelings such as feeling blue, despair, anxiety and depression?                                                               | 1          | 2        | 3                     | 4          | 5         |
|                                                                                                                                                                   | Not at all | A little | Somewhat              | Very much  | Extremely |
| 29. To what extent have you been affected in your activities, by the death or separation of your spouse or a family member (which occurred during the past year)? | 1          | 2        | 3                     | 4          | 5         |
|                                                                                                                                                                   | Very poor  | Poor     | Neither poor nor good | Good       | Very good |
| 30. Considering all of the above how would you rate your 'quality of life'?                                                                                       | 1          | 2        | 3                     | 4          | 5         |

**E4.** In general, how happy do you feel, on a scale of 0 – 10 where 0 is least happy and 10 most happy? *Circle the number on the scale*

0    1    2    3    4    5    6    7    8    9    10

**Section F: Physical measurements**

Before I ask you more questions, I would like to measure your blood pressure, and pulse, your weight, height, waist, hips, upper arm and arm span, and check your eyesight.

**F1.** First I would like to measure your blood pressure and pulse rate. Please stay seated, and once I put this on your wrist keep it steady and at the level of your heart. We will need to take the blood pressure reading and pulse three times. It will squeeze your wrist a bit, but won't hurt. Relax.

Refused 97

Not able 98

**Time 1** Systolic (mmHg)

Diastolic (mmHg)

Pulse rate / minute.

*Ask the respondent to release the arm and relax. Wait for one minute before time 2. Do not ask the respondent questions.*

Now we can get your second measurement for your blood pressure.

**Time 2** Systolic (mmHg)

Diastolic (mmHg)

Pulse rate / minute

*Again, remind the respondent to relax. Meanwhile, when waiting to take the third measurement, you can locate and measure out a 4 metre length to prepare for the vision test.*

Now we can get your third measurement for your blood pressure.

**Time 3** Systolic (mmHg)

Diastolic (mmHg)

Pulse rate / minute

|      |       |
|------|-------|
| SID: | Date: |
|------|-------|

**F2.** I would now like to measure how tall you are. Please put your feet and heels close together, stand straight and look forward standing with your back, head and heels touching the wall. Look straight ahead.

Measured height (cms)    .    
 Refused 97   
 Not able 98

**F3.** Now we want to measure your weight. Please step on this scale.

Measured weight (Kgs)    .    
 Refused 97   
 Not able 98

**F4.** Now we want to measure around your waist.

*Identify the top of the hip bone - and make sure the tape measure is parallel to the floor all the way around the body.*

Waist circumference (cms)    .    
 Refused 97   
 Not able 98

**F5.** Next we will measure around your hips.

*Measure at the maximum circumference of the hips - and make sure the tape measure is parallel to the floor all the way around the body*

Hip circumference (cms)    .    
 Refused 97   
 Not able 98

**F6.** Now I will measure around your left upper arm.

*Use your MUAC tape to measure around the left upper arm at the mid-point between the tip of the shoulder and the tip of the elbow.*

MUAC (cms)   .    
 Refused 97   
 Not able 98

**F7.** Next we will measure your arm span.

Please stand against the wall with your arm extended sideways at a 90 degree angle. Measure from one tip of the middle finger to the U-point.

Half arm span (cms)    .    
 Refused 97   
 Not able 98

Now we are going to check your vision. First I am going to test your distance vision.

*If the elder is wearing spectacles, ask them to keep them on for this test. Follow the instructions in the manual carefully. Check that the light level is satisfactory. Look at the chart from a distance of 4 metres and check that you can read the 0.0 line yourself.*

**F8.** First I am going to test your distance vision with your right eye. Would you please cover your left eye with the occluder. Please start at the top line of the chart and tell me which way the Es are pointing. Read each line in turn.

Distance Vision – Right Eye      .

**F9.** Now cover your right eye so I can test your left eye. Please start at the top line of the chart and tell me which way the Es are pointing. Read each line in turn.

Distance Vision - Left Eye      .

*If the elder cannot read the line 0.5, check their vision through the pinhole. If they can read line 0.5 or the lines below it then measure their near vision next (F12.).*

Now I would like to see if your vision would be better with spectacles.

**F10.** First I am going to test your right eye. Would you please cover your left eye. Please read the first line of the chart. Now look through the pinhole. Please start at the top line of the chart and tell me which way the Es are pointing. Read each line in turn.

Distance Vision with pinhole - Right Eye      .

**F11.** Now I am going to test your left eye. Would you please cover your right eye. Please read the first line of the chart. Now look through the pinhole. Please start at the top line of the chart and tell me which way the Es are pointing. Read each line in turn.

Distance Vision with pinhole - Left Eye      .

- *If the distance visual acuity score is equal to or more than 0.5 in either eye, and there is no improvement looking through the pinhole - refer for assessment by ophthalmologist (yellow form).*
- *If the visual acuity score improves to 0.5 or less when looking through the pinhole in either eye it is likely that vision can be improved with spectacles – refer for assessment by an optometrist (blue form).*

|      |       |
|------|-------|
| SID: | Date: |
|------|-------|

*Next, check the near vision. First check the light level again by checking that you can read the near vision chart line 0.0 from 40 cms (using your 40cms measuring stick). With the elder sitting comfortably, place the rubber end of the measuring stick against the outer corner of their right eye and the other end on the near vision chart.*

**F12.** Now I would like to test your near vision. Looking with both eyes, please start at the top line of the chart and tell me which way the Es are pointing. Read each line in turn.

Near Vision  .

*Next you will check for cataract. Take the elder to a dimly lit room. Explain that you would like to look in each eye in turn with the light.*

Look at the pupil of each eye in turn with the ophthalmoscope / torch from a distance of about 30 cms. The pupil should look red. If the lens has a cataract the light will not pass through to the retina at the back of the eye, so you will not see the red reflex.

**F13.** Right eye – red reflex Yes 1   
No 2

**F14.** Left eye – red reflex Yes 1   
No 2

*If there is no red reflex in one or both eyes record ‘possible cataract’ on a yellow referral form and give it to the elder. Tell the elder that they may have a cataract and you will refer them for a further assessment from an eye care professional.*

**Section G. Family and community participation**

The next questions are about your activities, your family and your community.

**G1.** In your community are there any organized social activities that are for older people? For example, activities might be organized by a Community Based Organisation (CBO), Women’s Group or religious leader?

- Yes 1
- No 2
- Don’t know 89

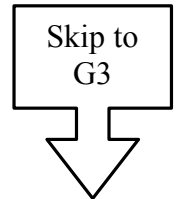

**G2.** What type of activity is it? .....

**G3.** Is there an Elders’ Committee in your Grama Niladari Division?

- Yes 1
- No 2
- Don’t know 89

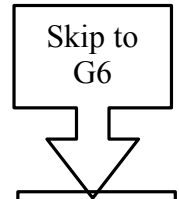

**G4.** Have you attended any meetings of the Elders’ Committee?

- Yes 1
- No 2

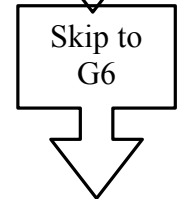

**G5.** How many meetings of the Elders’ Committee have you attended in the past 3 months?

**G6.** In the last year, have you taken part in any social activities (for any age group) in your community? *Read all responses and tick all that apply.*

- No 1
- Community Based Organisation (CBO) 2
- Women’s Group 3
- Youth or Children’s Group 4
- Temple / Church activities 5
- Informal activities with friends 6
- Activities with elders 7
- Sporting activity 8
- Other ..... 9

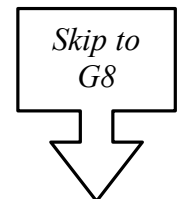

|      |       |
|------|-------|
| SID: | Date: |
|------|-------|



**G7.** In the last year, how often did you take part in the activities you mentioned?  
*Ask only about the activities mentioned in G6. Tick whichever is closest.*

|                                  | Daily | Once a week | Once a month | Every six months | Once a year or less |
|----------------------------------|-------|-------------|--------------|------------------|---------------------|
| Community Based Organisation     |       |             |              |                  |                     |
| Women's Group                    |       |             |              |                  |                     |
| Youth or children's Group        |       |             |              |                  |                     |
| Temple / church activities       |       |             |              |                  |                     |
| Informal activities with friends |       |             |              |                  |                     |
| Activities with elders           |       |             |              |                  |                     |
| Sporting activity                |       |             |              |                  |                     |
| Other                            |       |             |              |                  |                     |

**G8.** Do you currently do any paid or income-generating work?

Yes

No

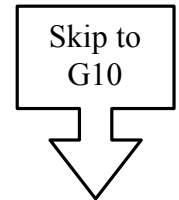

**G9.** For how many hours do you do paid or income-generating work each week, on average?

*If the elder works in an irregular way, help them to work out an average for a week*

*If the elder works in an irregular way, help them to work out an average for a week*

**G10.** For how many hours do you work at unpaid work, such as

cooking, cleaning, gardening, or child care each day, on average?

**G11.** Do you have a friend or friends that you feel comfortable with, that you can talk

to about private matters, or can call on for help?

Yes

No

**G12.** How long does it take to travel to Nuwara Eliya / Walapane?

Less than one hour

1 – 2 hours

3 – 4 hours

5 – 6 hours

Don't know



**Section H. Health-care seeking behaviour**

The next questions are about health care.

- H1.** If you were feeling ill, for example, with fever, cough with phlegm, and chest pain, who would you go to for advice and treatment?  
*Do not read out the responses - tick all that the elder mentions*
- |                    |    |                          |
|--------------------|----|--------------------------|
| Traditional healer | 1  | <input type="checkbox"/> |
| Another elder      | 2  | <input type="checkbox"/> |
| Religious leader   | 3  | <input type="checkbox"/> |
| EMA                | 4  | <input type="checkbox"/> |
| PHM                | 5  | <input type="checkbox"/> |
| Hospital clinic    | 6  | <input type="checkbox"/> |
| Private clinic     | 7  | <input type="checkbox"/> |
| No one             | 8  | <input type="checkbox"/> |
| Don't know         | 89 | <input type="checkbox"/> |
| Other              | 9  | <input type="checkbox"/> |

- H2.** What difficulties do you face in attending a dispensary, clinic or hospital?  
*Do not read out the responses - tick all that the elder mentions*
- |                                      |    |                          |
|--------------------------------------|----|--------------------------|
| Transport                            | 1  | <input type="checkbox"/> |
| No one to go with me                 | 2  | <input type="checkbox"/> |
| Can't afford to pay                  | 3  | <input type="checkbox"/> |
| Worried about long waiting times     | 4  | <input type="checkbox"/> |
| Worried about health staff attitudes | 5  | <input type="checkbox"/> |
| Prefer to take home remedies         | 6  | <input type="checkbox"/> |
| Prefer to see a traditional healer   | 7  | <input type="checkbox"/> |
| Other                                | 9  | <input type="checkbox"/> |
| .....                                |    |                          |
| Don't know                           | 89 | <input type="checkbox"/> |

**H3.** How often in the past month have you visited a hospital, clinic or dispensary?

**H4.** How often in the past month have you visited an ayurvedic doctor or clinic?

**H5.** How much do you estimate that you have spent on health care in the past month?  
(e.g. to pay for medicines, supplies, investigations, fees)?

- Don't know 89
- Nothing 1
- Rps 1 – 100 2
- Rps 101 – 500 3
- Rps 501 – 1000 4
- Rps 1001 – 2000 5
- Rps 2001 – 3000 6
- Rps 3001 – 4000 7
- Rps 4001 – 5000 8
- Other 9
- .....

**H6.** In the last year have any health or social welfare staff visited you at home?

- Yes
- No

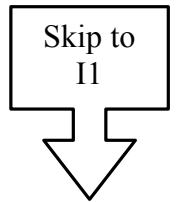

**H7.** Which of the following have visited you in the past year? *(Read all responses and tick all that apply)*

- Public Health Inspector 1
- Public Health Midwife or Estate Midwife 2
- Estate Medical Assistant 3
- Social Welfare Officer 4
- Elders' Rights Protection Officer 5

|      |       |
|------|-------|
| SID: | Date: |
|------|-------|

**Section I. Health risk factors**

The next questions are about your food.

- I1.** How often do you eat meat, egg or fish?  
*Read all responses*
- |                      |   |                          |
|----------------------|---|--------------------------|
| Every day            | 1 | <input type="checkbox"/> |
| At least once a week | 2 | <input type="checkbox"/> |
| Occasionally         | 3 | <input type="checkbox"/> |
| Never                | 4 | <input type="checkbox"/> |

- I2.** How many servings of vegetables do you eat on a typical day?  
*(Show picture card)*
- Don't know 89

- I3.** How many servings of fruit do you eat on a typical day?  
*(Show picture card)*
- Don't know 89

- I4.** Have you tried to reduce the amount of salt in your diet?
- |     |   |                          |
|-----|---|--------------------------|
| Yes | 1 | <input type="checkbox"/> |
| No  | 2 | <input type="checkbox"/> |

- I5.** In the last 12 months, were you ever hungry but didn't eat because there was not enough money to buy food?  
*Read all responses*
- |                                  |   |                          |
|----------------------------------|---|--------------------------|
| Almost every month               | 1 | <input type="checkbox"/> |
| Some months, but not every month | 2 | <input type="checkbox"/> |
| Only in 1 or 2 months            | 3 | <input type="checkbox"/> |
| Never                            | 4 | <input type="checkbox"/> |

Now I am going to ask you about physical activity.

- I6.** Thinking of the last month, how much time have you spent sitting down on a typical day?  
Hours and minutes  :

- I7.** Thinking of the last month, in a typical week on how many days do you do vigorous activity (that raises your heart beat and your breathing a lot) as part of your work or your leisure time?  
Days

**I18.** Thinking of the last month, how much time did you spend doing vigorous activity on a typical day? Hours and minutes :

**I19.** Thinking of the last month, in a typical week on how many days did you do moderate intensity activity (that raises your heart beat and your breathing a little) as part of your work or your leisure time? Days

**I10.** Thinking of the last month, how much time do you spend doing moderate activity on a typical day? Hours and minutes :

**I11.** What is your usual source of drinking water?

|                                     |   |                          |
|-------------------------------------|---|--------------------------|
| Tap in the home                     | 1 | <input type="checkbox"/> |
| Tap outside – closer than 50 yards  | 2 | <input type="checkbox"/> |
| Tap outside – further than 50 yards | 3 | <input type="checkbox"/> |
| River                               | 4 | <input type="checkbox"/> |
| Well                                | 5 | <input type="checkbox"/> |
| Other                               | 9 | <input type="checkbox"/> |

.....

**I12.** How long do you spend collecting water each day?

|                                    |   |                          |
|------------------------------------|---|--------------------------|
| 0 – someone else fetches the water | 1 | <input type="checkbox"/> |
| 0 – tap in the home                | 2 | <input type="checkbox"/> |
| 5 – 30 minutes                     | 3 | <input type="checkbox"/> |
| half to one hour                   | 4 | <input type="checkbox"/> |
| one – two hours                    | 5 | <input type="checkbox"/> |
| more than two hours                | 6 | <input type="checkbox"/> |

**I13.** What type of toilet do you use?

|                           |   |                          |
|---------------------------|---|--------------------------|
| Modern water-flush toilet | 1 | <input type="checkbox"/> |
| Pour-flush pit latrine    | 2 | <input type="checkbox"/> |
| Pit latrine               | 3 | <input type="checkbox"/> |
| No toilet                 | 4 | <input type="checkbox"/> |
| Other                     | 9 | <input type="checkbox"/> |

.....

|      |       |
|------|-------|
| SID: | Date: |
|------|-------|



|                                                                       |                         |                                                                                                       |                                                                                                  |
|-----------------------------------------------------------------------|-------------------------|-------------------------------------------------------------------------------------------------------|--------------------------------------------------------------------------------------------------|
| <b>I22.</b> Do you chew betel?                                        | Yes                     | 1 <input type="checkbox"/>                                                                            | <div style="border: 1px solid black; padding: 5px; display: inline-block;">Skip to I24</div><br> |
|                                                                       | No                      | 2 <input type="checkbox"/>                                                                            |                                                                                                  |
| <b>I23.</b> Do you add tobacco to the betel mix?                      | Yes                     | 1 <input type="checkbox"/>                                                                            |                                                                                                  |
|                                                                       | No                      | 2 <input type="checkbox"/>                                                                            |                                                                                                  |
| <b>I24.</b> Do you smoke cigarettes or beedis?                        | Yes                     | 1 <input type="checkbox"/>                                                                            | <div style="border: 1px solid black; padding: 5px; display: inline-block;">Skip to I28</div><br> |
|                                                                       | No                      | 2 <input type="checkbox"/>                                                                            |                                                                                                  |
| <b>I25.</b> How many do you smoke on average in one day?              |                         | <input type="checkbox"/> <input type="checkbox"/>                                                     |                                                                                                  |
| <b>I26.</b> In the past year have you thought about stopping smoking? | Yes                     | 1 <input type="checkbox"/>                                                                            |                                                                                                  |
|                                                                       | No                      | 2 <input type="checkbox"/>                                                                            |                                                                                                  |
| <b>I27.</b> In the past year have you tried to stop smoking?          | Yes                     | 1 <input type="checkbox"/>                                                                            | <div style="border: 1px solid black; padding: 5px; display: inline-block;">Skip to I30</div><br> |
|                                                                       | No                      | 2 <input type="checkbox"/>                                                                            |                                                                                                  |
| <b>I28.</b> Did you smoke cigarettes or beedis daily in the past?     | Yes                     | 1 <input type="checkbox"/>                                                                            | <div style="border: 1px solid black; padding: 5px; display: inline-block;">Skip to I30</div><br> |
|                                                                       | No                      | 2 <input type="checkbox"/>                                                                            |                                                                                                  |
| <b>I29.</b> How long ago did you stop smoking daily?                  | Years and months        | <input type="checkbox"/> <input type="checkbox"/> . <input type="checkbox"/> <input type="checkbox"/> |                                                                                                  |
|                                                                       | Don't know              | 89 <input type="checkbox"/>                                                                           |                                                                                                  |
| <b>I30.</b> In the last 12 months, how often did you drink alcohol?   | Never                   | 1 <input type="checkbox"/>                                                                            |                                                                                                  |
|                                                                       | Less than once a month  | 2 <input type="checkbox"/>                                                                            |                                                                                                  |
|                                                                       | 1-3 days per month      | 3 <input type="checkbox"/>                                                                            |                                                                                                  |
|                                                                       | 1 or more days per week | 4 <input type="checkbox"/>                                                                            |                                                                                                  |

|      |       |
|------|-------|
| SID: | Date: |
|------|-------|



**I31.** Have you ever tried to cut down on drinking alcohol?

Yes 1

No 2



**Section K. Economic issues**

The next questions are about your economic situation. We know this is a sensitive subject. Please remember that the questionnaire will not have your name on it. I am going to read out categories, so you don't need to tell me an exact amount.

**K1.** On average, how much money do you get for yourself each month? *Read all responses*

- No money at all 1
- Below 1000 Rps 2
- 1001-5000 Rps 3
- 5001-10,000 Rps 4
- More than 10,000 Rps 5

**K2.** What are your sources of income? *Read all responses, tick whichever are correct*

- Paid work 1
- Own income generating activity 2
- Employees' Provident Fund (EPF) 3
- Government pension 4
- Government benefit 5
- Other family members 6
- Other 9
- .....

**K3.** How many people in your household other than yourself received income in the last year?

*Do not ask if living alone.*

**K4.** What is your estimate of the total income of all household members, from all sources, in the last month? I will read the categories.

*Read all responses*

- 0 – 1000 Rps 1
- 1001 – 5000 Rps 2
- 5001 – 10,000 Rps 3
- 10,001 – 15,000 Rps 4
- 15,001 – 20,000 Rps 5
- More than 20,000 Rps 6

**K5.** Do you have any debt?

- Yes 1
- No 2

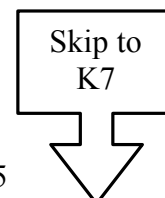

**K6.** How big a worry is the debt to you? *Read all responses*

|                    |  |   |                          |
|--------------------|--|---|--------------------------|
| Not a worry at all |  | 1 | <input type="checkbox"/> |
| A small worry      |  | 2 | <input type="checkbox"/> |
| A big worry        |  | 3 | <input type="checkbox"/> |

**K7.** During your working life did you save money for your retirement and old age?

|     |  |   |                          |
|-----|--|---|--------------------------|
| Yes |  | 1 | <input type="checkbox"/> |
| No  |  | 2 | <input type="checkbox"/> |

**K8.** Did you receive a lump sum when you retired?

|     |  |   |                          |
|-----|--|---|--------------------------|
| Yes |  | 1 | <input type="checkbox"/> |
| No  |  | 2 | <input type="checkbox"/> |

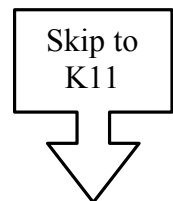

**K9.** What has happened to this lump sum? *Read all responses*

|                   |  |   |                          |
|-------------------|--|---|--------------------------|
| Saved in the bank |  | 1 | <input type="checkbox"/> |
| All spent         |  | 2 | <input type="checkbox"/> |
| Most spent        |  | 3 | <input type="checkbox"/> |
| Some spent        |  | 4 | <input type="checkbox"/> |

**K10.** If all spent – how long after you got it was it spent? (months. weeks) .

**K11.** In your opinion which would be better? *Read all responses*

|                                                         |  |    |                          |
|---------------------------------------------------------|--|----|--------------------------|
| To get a lump sum when you retire                       |  | 1  | <input type="checkbox"/> |
| To get a regular fortnightly or monthly pension payment |  | 2  | <input type="checkbox"/> |
| Don't know                                              |  | 89 | <input type="checkbox"/> |

Thank you very much for your kind cooperation.

*To the interviewer: Now, please complete the interviewer assessment form below, and the Contact Record and Locator Form.*

|      |       |
|------|-------|
| SID: | Date: |
|------|-------|

## Interviewer assessment

1. What is your assessment of the elder's cooperation?  
(or family member if interviewed)
- |           |   |                          |
|-----------|---|--------------------------|
| Very good | 1 | <input type="checkbox"/> |
| Good      | 2 | <input type="checkbox"/> |
| Moderate  | 3 | <input type="checkbox"/> |
| Bad       | 4 | <input type="checkbox"/> |
| Very bad  | 5 | <input type="checkbox"/> |
4. What is your evaluation of the accuracy and completeness of the elder's answers?  
(or family member if interviewed)
- |           |   |                          |
|-----------|---|--------------------------|
| Very high | 1 | <input type="checkbox"/> |
| High      | 2 | <input type="checkbox"/> |
| Average   | 3 | <input type="checkbox"/> |
| Low       | 4 | <input type="checkbox"/> |
| Very low  | 5 | <input type="checkbox"/> |
5. Were there any questions with doubtful answers? If so, which were they?
6. Are there any problems or queries that need follow-up or clarification from the Research Coordinator?
